# Supplementary material for: Synergistic effect of CoII, NiII and FeII/FeIII in trimetallic MOFs for enhancing electrocatalytic water oxidation
Source: Royal Society of Chemistry journal article supplement (doi:10.1039/d4ce00953c), 2024-01-01
Supplement: d4ce00953c1.pdf [file d4ce00953c1.pdf]

## Supporting information

### **Synergistic effect of Co<sup>II</sup>, Ni<sup>II</sup> and Fe<sup>II</sup>/Fe<sup>III</sup> in trimetallic MOFs for enhancing electrocatalytic water oxidation**

Yaling Wu,<sup>†</sup> Zhaopeng Sun,<sup>†</sup> Lingmeng Yu,<sup>†</sup> Yingying Chen,<sup>†</sup> Zhibo Li,<sup>†</sup> Mengli Li,<sup>†</sup>

Dan Liu,<sup>†</sup> Zheng Yan,<sup>\*†</sup> and Xuebo Cao<sup>\*†</sup>

<sup>†</sup> College of Biological, Chemical Sciences and Engineering, Jiaying University, Jiaying 314001, P. R. China

\* Correspondence to: yzheng158@zjxu.edu.cn (Z. Yan); xbcao@zjxu.edu.cn (X. Cao)

## **Contents:**

### **1. Experimental Sections**

### **2. Figures**

S1. Sample diagram of five MOFs.

S2. SEM images of **Co-MOF**, **Ni-MOF** and **Co<sub>1</sub>Ni<sub>1</sub>-MOF**.

S3. SEM image and EDS elemental mapping images of **(Co<sub>1</sub>Ni<sub>1</sub>)<sub>2</sub>Fe<sub>1</sub>(III)-MOF**.

S4. Full XPS Survey spectrum of the five MOFs.

S5. EDS elemental Analysis of **(Co<sub>1</sub>Ni<sub>1</sub>)<sub>2</sub>Fe<sub>1</sub>(II)-MOF** and **(Co<sub>1</sub>Ni<sub>1</sub>)<sub>2</sub>Fe<sub>1</sub>(III)-MOF**.

S6. High-resolution spectra of C 1s and O 1s.

S7. FT-IR spectrum of five MOFs.

S8. TGA of five MOFs.

S9. Overpotential at current density of 10 mA cm<sup>-2</sup>.

S10. CV curves of four MOFs.

S11. Overpotentials of two different valence trimetallic doped MOFs at a current density of 10 mA cm<sup>-2</sup>.

S12. CV curves of **(Co<sub>1</sub>Ni<sub>1</sub>)<sub>2</sub>Fe<sub>1</sub>(II)-MOF** and **(Co<sub>1</sub>Ni<sub>1</sub>)<sub>2</sub>Fe<sub>1</sub>(III)-MOF**.

## Experimental Sections

**Chemicals:** 2, 5-thiophenedicarboxylic ( $H_2TDC$ , 98%), cobalt(II) acetate tetrahydrate ( $Co(CH_3COO)_2 \cdot 4H_2O$ ), nickel(II) acetate tetrahydrate ( $Ni(CH_3COO)_2 \cdot 4H_2O$ ), Iron(II) acetate ( $Fe(CH_3COO)_2$ ), hydroxydiacetyl iron hydrate ( $Fe(OH)(CH_3COO)_2 \cdot nH_2O$ ) were purchased from Shanghai Aladdin Biochemical Technology Co., Ltd. NaOH, KOH, EtOH and  $IrO_2$  were from Sinopharm Chemical Reagent Co., Ltd. All aqueous solutions were prepared with DI water. All chemicals are analytical grade and used as received without further purification.

**Synthesis of Co-MOF:**  $H_2TDC$  (1 mmol),  $Co(CH_3COO)_2 \cdot 4H_2O$  (1 mmol),  $H_2O$  (10 mL), and EtOH (10 mL) were placed into a 50 mL polytetrafluoroethylene-lined reaction kettle. The mixture was stirred at room temperature until dissolved, subjected to 5 minutes of ultrasonic treatment, and stirred again for uniformity. The mixture was then transferred into a stainless steel autoclave and placed in a convection oven. It was heated at 100 °C for 10 hours. After cooling to room temperature, the precipitate was obtained by vacuum filtration and washed multiple times with anhydrous ethanol. Finally, the precipitate was dried in a vacuum drying oven at 60 °C for 24 hours.

**Synthesis of Ni-MOF:** The preparation steps of Ni-MOF are similar to Co-MOF, with the difference being that  $Co(CH_3COO)_2 \cdot 4H_2O$  (1 mmol) was replaced by  $Ni(CH_3COO)_2 \cdot 4H_2O$  (1 mmol).

**Synthesis of  $Co_1Ni_1$ -MOF:**  $H_2TDC$  (1 mmol),  $Ni(CH_3COO)_2 \cdot 4H_2O$  (0.5 mmol),  $Co(CH_3COO)_2 \cdot 4H_2O$  (0.5 mmol),  $H_2O$  (10 mL), and EtOH (10 mL) were placed into a 50 mL polytetrafluoroethylene-lined reaction kettle. The mixture was stirred at room temperature until dissolved, subjected to 5 minutes of ultrasonic treatment, and stirred again for uniformity. The mixture was then transferred into a stainless steel autoclave and placed in a convection oven. It was heated at 100 °C for 10 hours. After cooling to room temperature, the precipitate was obtained by vacuum filtration and washed multiple times with anhydrous ethanol. Finally, the precipitate was dried in a vacuum drying oven at 60 °C for 24 hours.

**Synthesis of (Co<sub>1</sub>Ni<sub>1</sub>)<sub>2</sub>Fe<sub>1</sub>(II)-MOF:** H<sub>2</sub>TDC (1 mmol), Ni(CH<sub>3</sub>COO)<sub>2</sub>·4H<sub>2</sub>O (0.33 mmol), Co(CH<sub>3</sub>COO)<sub>2</sub>·4H<sub>2</sub>O (0.33 mmol), Fe(CH<sub>3</sub>COO)<sub>2</sub> (0.33 mmol), H<sub>2</sub>O (10 mL), and EtOH (10 mL) were placed into a 50 mL polytetrafluoroethylene-lined reaction kettle. The mixture was stirred at room temperature until dissolved, subjected to 5 minutes of ultrasonic treatment, and stirred again for uniformity. The mixture was then transferred into a stainless steel autoclave and placed in a convection oven. It was heated at 100 °C for 10 hours. After cooling to room temperature, the precipitate was obtained by vacuum filtration and washed multiple times with anhydrous ethanol. Finally, the precipitate was dried in a vacuum drying oven at 60 °C for 24 hours.

**Synthesis of (Co<sub>1</sub>Ni<sub>1</sub>)<sub>2</sub>Fe<sub>1</sub>(III)-MOF:** The preparation steps of (Co<sub>1</sub>Ni<sub>1</sub>)<sub>2</sub>Fe<sub>1</sub>(III)-MOF are similar to (Co<sub>1</sub>Ni<sub>1</sub>)<sub>2</sub>Fe<sub>1</sub>(II)-MOF, with the difference being that Fe(CH<sub>3</sub>COO)<sub>2</sub> (0.33 mmol) was replaced by Fe(OH)(CH<sub>3</sub>COO)<sub>2</sub>·nH<sub>2</sub>O (0.33 mmol).

**Materials Characterization:** The morphology and structure of the MOFs were analyzed by scanning electron microscopy (SEM, Hitachi S-4800) with energy dispersive spectroscopy (EDS). Infrared spectra were carried out by a THERMO NicoletNexus 470 FT-IR spectrometer. XRD-7000 was used to collect the powder X-ray diffraction (PXRD) patterns with a Cu K $\alpha$  radiation source, which was produced by SHIMADZU. Thermogravimetric analysis (TGA) was conducted by the NETZSCH SAT-409PC in a nitrogen flow. The content of transition metals such as Co, Ni, and Fe was measured using X-ray photoelectron spectroscopy (XPS, THERMO ESCALAB 250Xi) and Inductively Coupled Plasma Spectrometer (ICP, Agilent ICP-OES720).

**Electrochemical measurement.** Electrochemical measurements were implemented in a three-electrode system with an Hg/HgO (0.1 M KOH) electrode as the reference electrode and a carbon rod as the counter electrode, and a glassy carbon (GC) electrode loaded with MOFs was used as the working electrode. All potentials are calculated by the Nernst equation ( $E$  (V vs. RHE) =  $E$  (V vs. Hg/HgO) + 0.0977 + 0.059 pH), using the reversible hydrogen electrode (RHE) as a reference. The catalyst

ink was prepared by the following method: fully ground 10 mg catalyst and 10 mg conductive carbon powder in a mortar, then take 5 mg of the above-mixed powder into a 2 mL centrifugation tube, 460  $\mu\text{L}$  isopropanol and 40  $\mu\text{L}$  Nafion solution were added and ultrasonication for 45 minutes. Spread 5  $\mu\text{L}$  of homogeneous solution evenly on a freshly polished glassy carbon electrode and place it in an infrared drying oven for complete drying. The catalyst mass loading is approximately  $0.36 \text{ mg cm}^{-2}$ . The linear scan voltammetry (LSV) curves of obtained MOFs were recorded with an applied potential window of 0-0.8 V vs. Hg/HgO, the scan rate is  $5 \text{ mV s}^{-1}$ . The electrochemically active surface areas (ECSAs) are usually estimated from the electrochemical double-layer capacitance ( $C_{\text{dl}}$ ) via collecting cyclic voltammograms (CVs).<sup>[1-3]</sup> The  $C_{\text{dl}}$  was determined from cyclic voltammograms measured in a non-Faradaic region at different scan rates in the potential range from 0 to 0.1 V versus Hg/HgO. The current differences at 0.1 V against ( $\nu = 10, 20, 30, 40, 80$  and  $160 \text{ mV/s}$ ) were fitted to obtain the  $C_{\text{dl}}$ :  $C_{\text{dl}} = I_c/\nu$ , where  $C_{\text{dl}}$ ,  $I_c$ , and  $\nu$  are the double-layer capacitance ( $\text{mF/cm}^2$ ) of the electroactive materials, charging current ( $\text{mA/cm}^2$ ), and scan rate ( $\text{mV/s}$ ). The electrochemical impedance spectroscopy (EIS) was recorded with the applied potential of 0.65 V versus RHE, and the frequency scan range was from  $10^{-2} \text{ Hz}$  to  $10^5 \text{ Hz}$ .

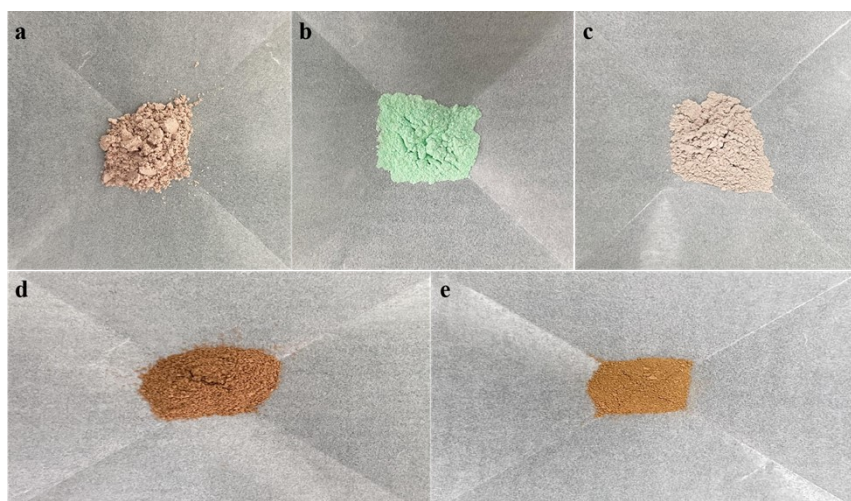

Fig. S1 Sample diagram. (a) Co-MOF, (b) Ni-MOF, (c)  $\text{Co}_1\text{Ni}_1\text{-MOF}$ , (d)  $(\text{Co}_1\text{Ni}_1)_2\text{Fe}_1(\text{II})\text{-MOF}$ , (e)  $(\text{Co}_1\text{Ni}_1)_2\text{Fe}_1(\text{III})\text{-MOF}$ .

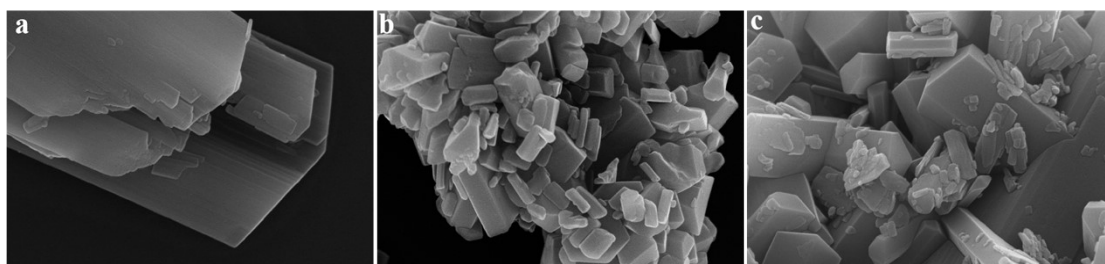

Fig. S2 SEM images. (a) Co-MOF, (b) Ni-MOF, (c) Co<sub>1</sub>Ni<sub>1</sub>-MOF.

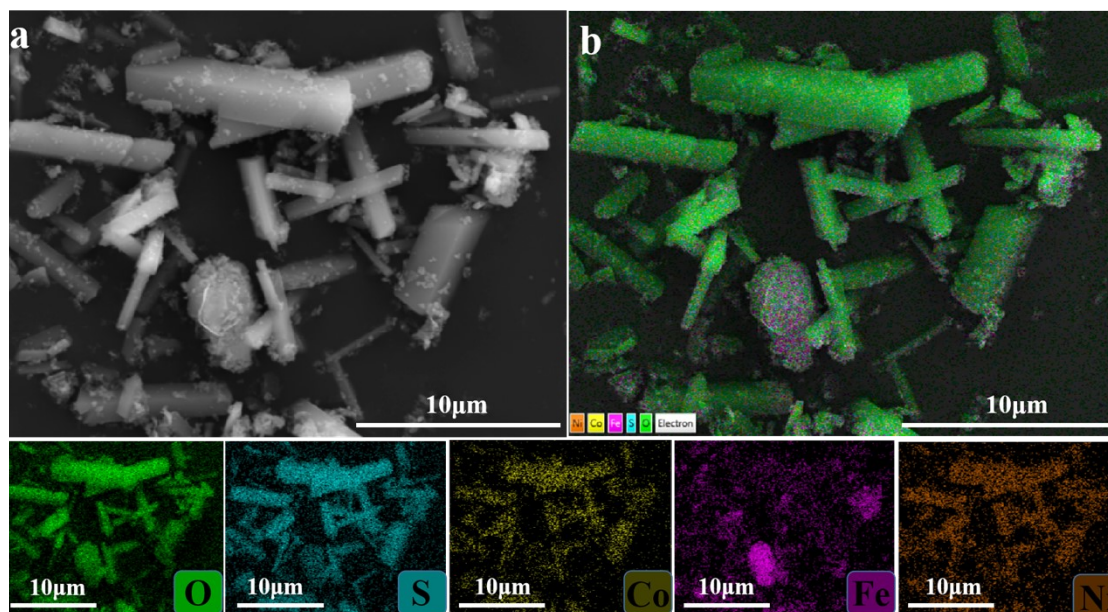

Fig. S3 (a) SEM image of (Co<sub>1</sub>Ni<sub>1</sub>)<sub>2</sub>Fe<sub>1</sub>(III)-MOF. (b) EDS layered images and elemental mapping images of (Co<sub>1</sub>Ni<sub>1</sub>)<sub>2</sub>Fe<sub>1</sub>(III)-MOF.

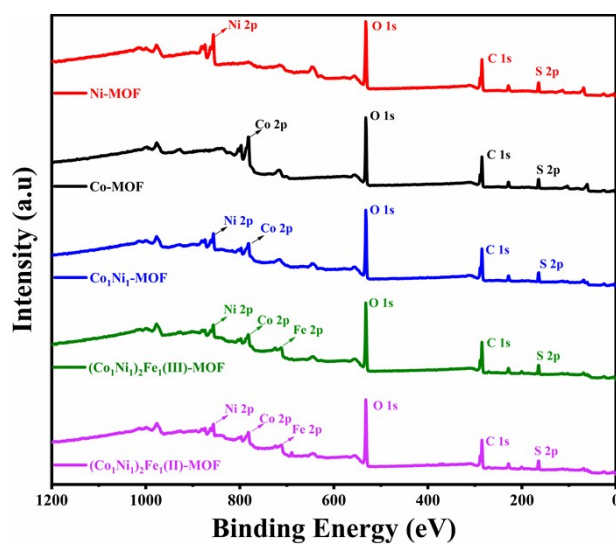

Fig. S4 Full XPS Survey spectrum of the five MOFs.

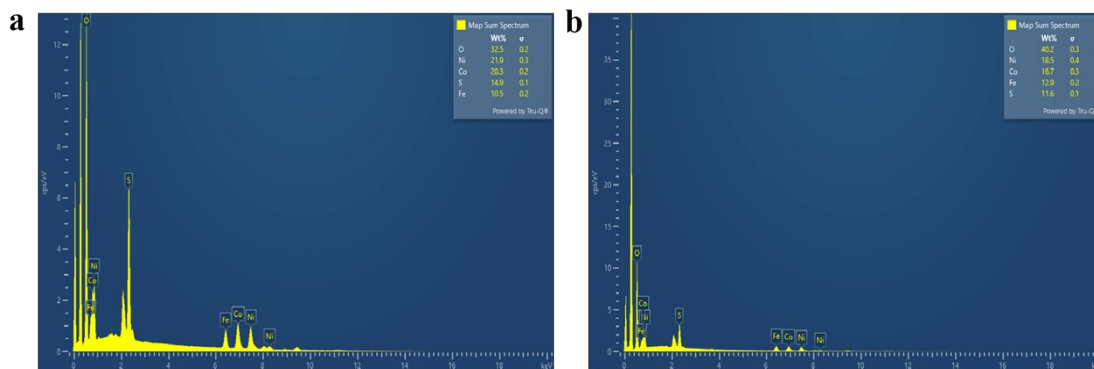

Fig. S5 EDS Elemental Analysis. (a)  $(\text{Co}_1\text{Ni}_1)_2\text{Fe}_1(\text{II})\text{-MOF}$ , (b)  $(\text{Co}_1\text{Ni}_1)_2\text{Fe}_1(\text{III})\text{-MOF}$ .

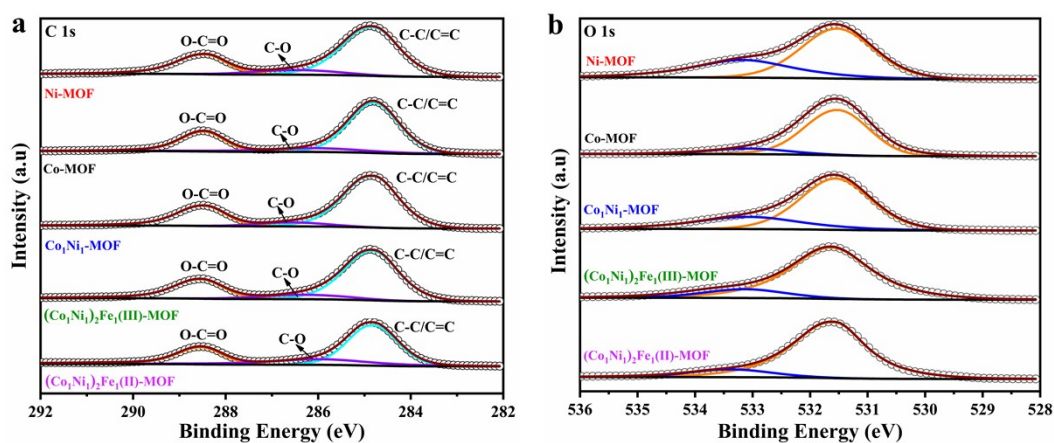

Fig. S6 High-resolution spectra of five MOFs. (a) C 1s, (b) O 1s.

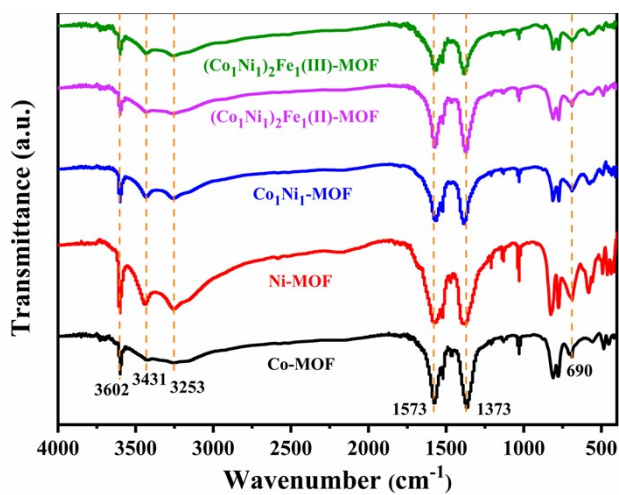

Fig. S7 FT-IR spectrum of five MOFs.

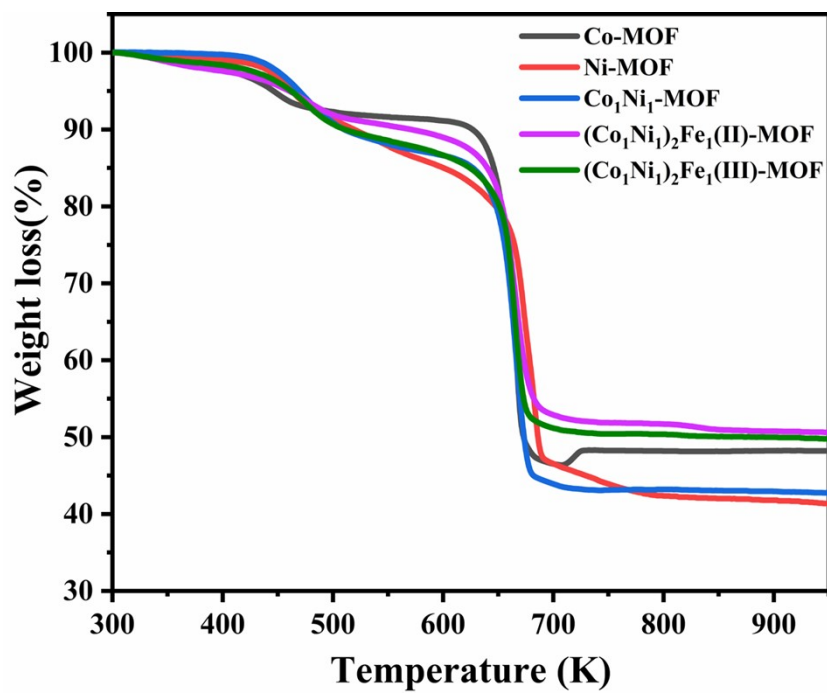

Fig. S8 TGA of five MOFs.

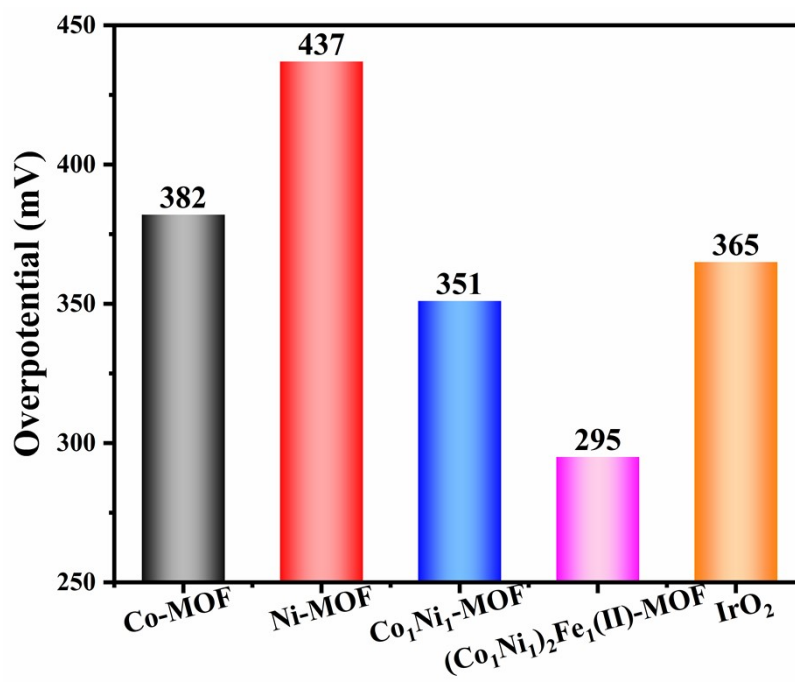

Fig. S9 Overpotential at current density of 10 mA cm<sup>-2</sup>.



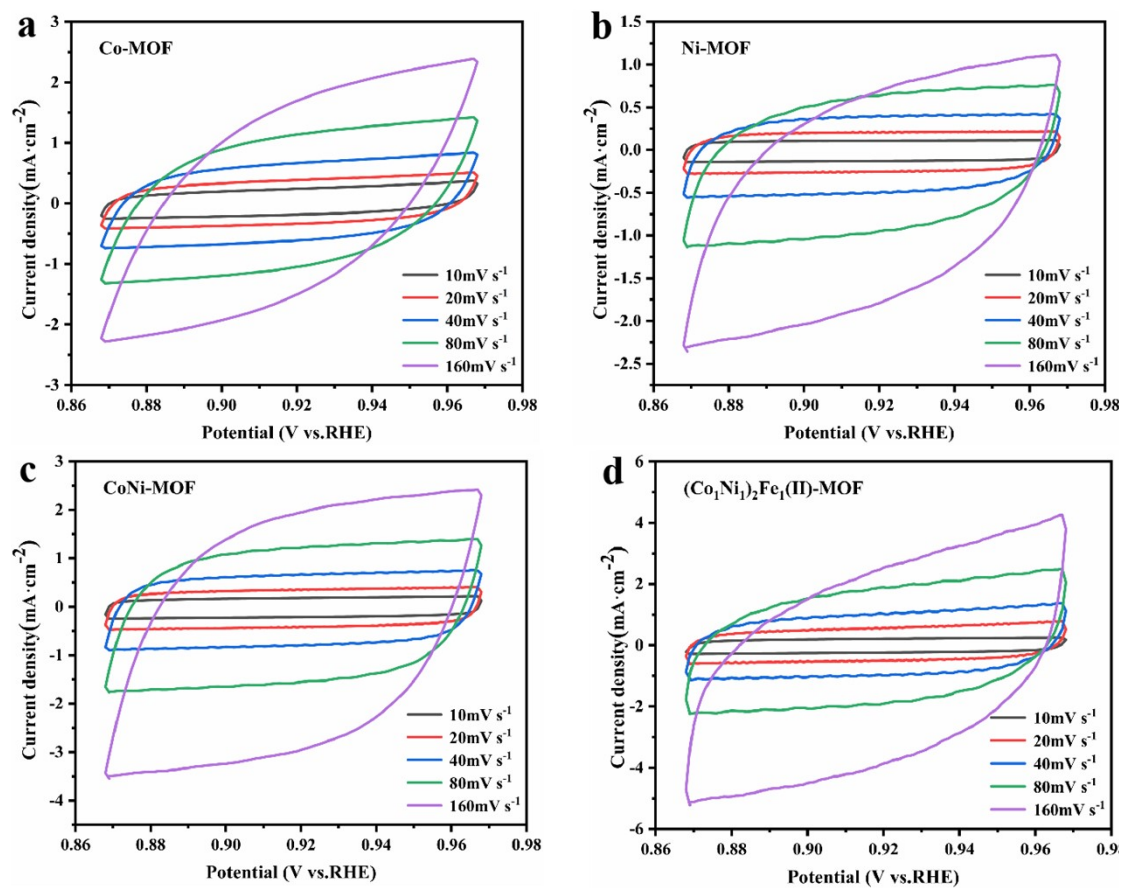

Fig. S10 CV curves. (a) Co-MOF, (b) Ni-MOF, (c)  $\text{Co}_1\text{Ni}_1\text{-MOF}$ , (d)  $(\text{Co}_1\text{Ni}_1)_2\text{Fe}_1(\text{II})\text{-MOF}$ .

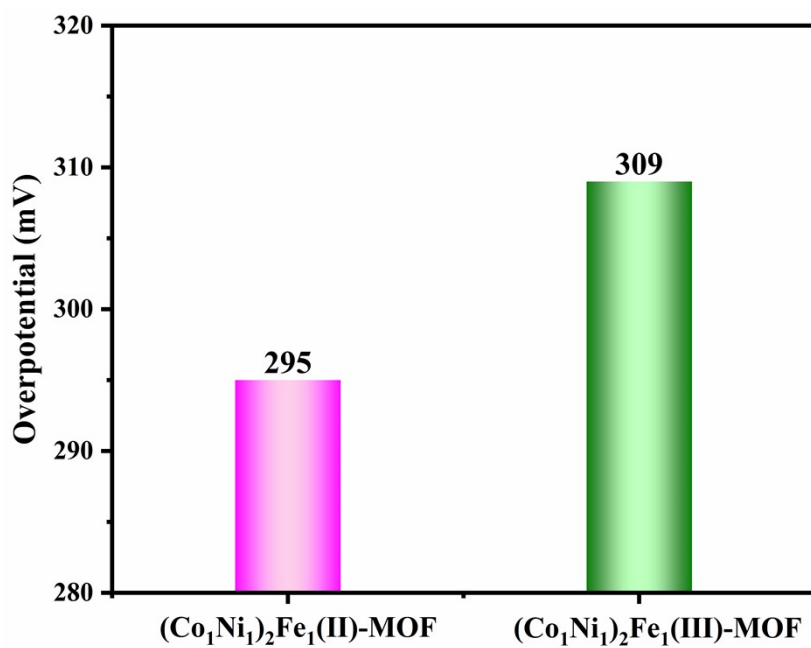

Fig. S11 Overpotentials of two different valence trimetallic doped MOFs at a current density of 10  $\text{mA cm}^{-2}$ .

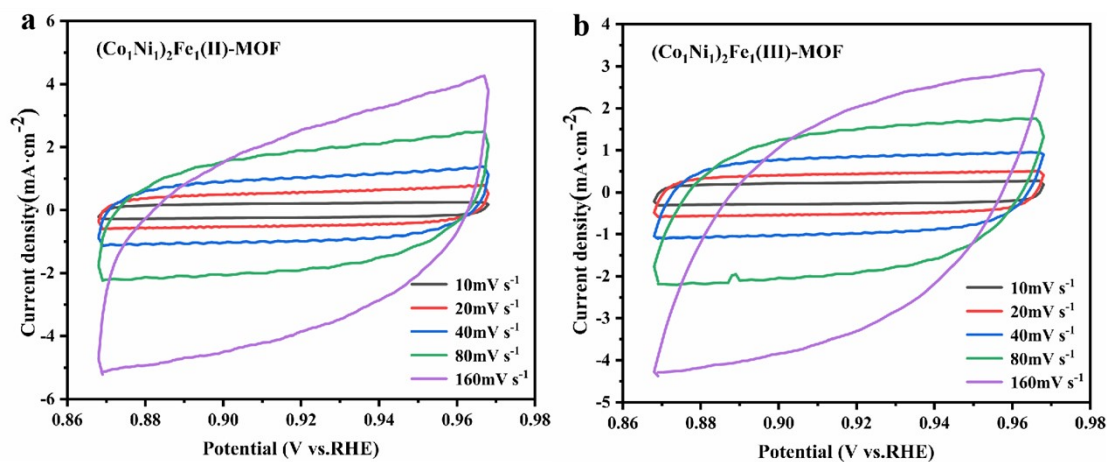

Fig. S12 CV curves of two MOFs. (a)  $(\text{Co}_1\text{Ni}_1)_2\text{Fe}_1(\text{II})\text{-MOF}$ , (b)  $(\text{Co}_1\text{Ni}_1)_2\text{Fe}_1(\text{III})\text{-MOF}$ .

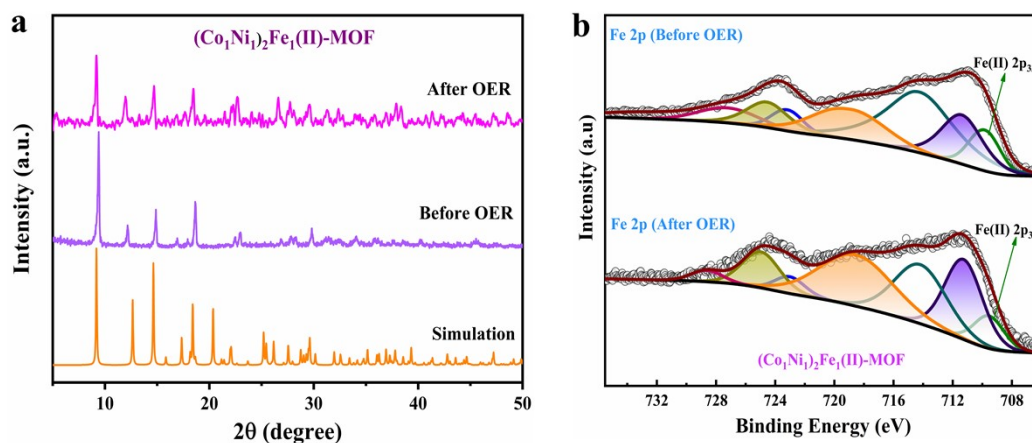

Fig. S13 Comparison of the (a) XRD patterns and (b) XPS spectra of  $(\text{Co}_1\text{Ni}_1)_2\text{Fe}_1(\text{II})\text{-MOF}$  before and after OER reaction.

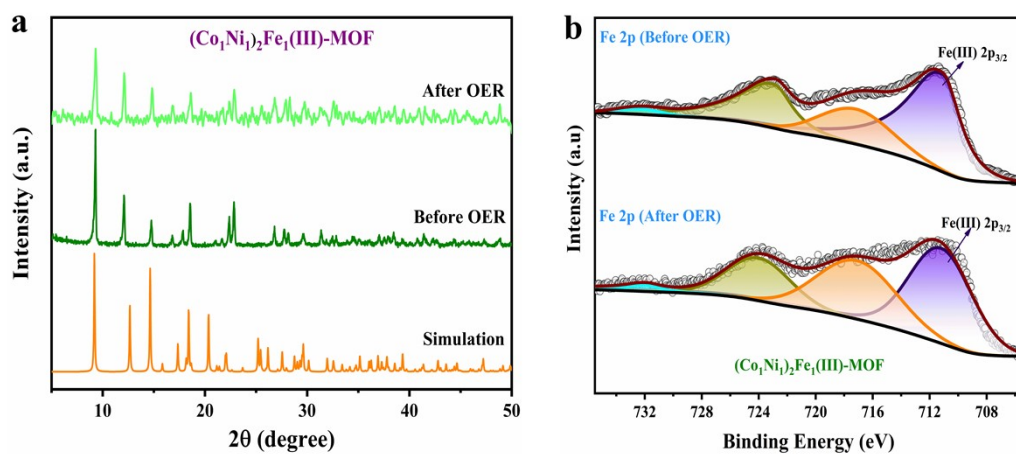

Fig. S14 Comparison of the (a) XRD patterns and (b) XPS spectra of  $(\text{Co}_1\text{Ni}_1)_2\text{Fe}_1(\text{III})\text{-MOF}$  before and after OER reaction.

**Table S1.** XPS high-resolution spectrum of **(Co<sub>1</sub>Ni<sub>1</sub>)<sub>2</sub>Fe(II)-MOF** (Co/Ni/Fe=5.15/5.10/4.83)

| (Co <sub>1</sub> Ni <sub>1</sub> ) <sub>2</sub> Fe <sub>1</sub> (II)-MOF | FWHM eV | Area (P) CPS.eV | Atomic % |
|--------------------------------------------------------------------------|---------|-----------------|----------|
| Co                                                                       | 3.14    | 200608.36       | 5.15     |
| Ni                                                                       | 2.25    | 197587.82       | 4.83     |
| Fe                                                                       | 6.02    | 167602.53       | 5.10     |

**Table S2.** XPS high-resolution spectrum of **(Co<sub>1</sub>Ni<sub>1</sub>)<sub>2</sub>Fe<sub>1</sub>(III)-MOF** (Co/Ni/Fe=4.80/4.75/5.16).

| (Co <sub>1</sub> Ni <sub>1</sub> ) <sub>2</sub> Fe <sub>1</sub> (III)-MOF | FWHM eV | Area (P) CPS.eV | Atomic % |
|---------------------------------------------------------------------------|---------|-----------------|----------|
| Co                                                                        | 3.74    | 177222.22       | 4.80     |
| Ni                                                                        | 2.25    | 184413.36       | 4.75     |
| Fe                                                                        | 4.90    | 160787.21       | 5.16     |

**Table S3.** ICP analysis for **(Co<sub>1</sub>Ni<sub>1</sub>)<sub>2</sub>Fe<sub>1</sub>(II)-MOF** (Co/Ni/Fe=1.983/1.973/2.050).

| (Co <sub>1</sub> Ni <sub>1</sub> ) <sub>2</sub> Fe <sub>1</sub> (II)-<br>MOF | Sampling<br>quality<br>(g) | Volum<br>e<br>(mL) | Coefficie<br>nt of dilution | Instrumen            |                |
|------------------------------------------------------------------------------|----------------------------|--------------------|-----------------------------|----------------------|----------------|
|                                                                              |                            |                    |                             | t readings<br>(mg/L) | Molar<br>ratio |
| Co                                                                           | 0.0346                     | 25                 | 100                         | 1.6176               | 1.983          |
| Ni                                                                           | 0.0346                     | 25                 | 100                         | 1.6025               | 1.973          |
| Fe                                                                           | 0.0346                     | 25                 | 100                         | 1.5889               | 2.050          |

**Table S4.** ICP analysis for **(Co<sub>1</sub>Ni<sub>1</sub>)<sub>2</sub>Fe<sub>1</sub>(III)-MOF** (Co/Ni/Fe=2.073/2.046/2.209).

| (Co <sub>1</sub> Ni <sub>1</sub> ) <sub>2</sub> Fe <sub>1</sub> (III)-<br>MOF | Sampling<br>quality<br>(g) | Vol<br>ume<br>(m<br>L) | Coefficie<br>nt of dilution | Instrume              |                |
|-------------------------------------------------------------------------------|----------------------------|------------------------|-----------------------------|-----------------------|----------------|
|                                                                               |                            |                        |                             | nt readings<br>(mg/L) | Molar<br>ratio |
| Co                                                                            | 0.0376                     | 25                     | 100                         | 1.8375                | 2.073          |
| Ni                                                                            | 0.0376                     | 25                     | 100                         | 1.8059                | 2.046          |
| Fe                                                                            | 0.0376                     | 25                     | 100                         | 1.8606                | 2.209          |

**Table S5.** Electrocatalytic OER activities of MOF-based and the state-of-the-art non-MOF catalysts in 0.1 M alkaline electrolyte between recently reported studies and this work.

| <i>Catalyst</i>                                                         | <i>Over potential<br/>@ 10 mA cm<sup>-2</sup></i> | <i>Tafel slope<br/>(mV dec<sup>-1</sup>)</i> | <i>Substrate</i> | <i>Ref.</i> |
|-------------------------------------------------------------------------|---------------------------------------------------|----------------------------------------------|------------------|-------------|
| $\beta$ -Co(OH) <sub>2</sub> /Co-MOF                                    | 405                                               | 124                                          | GC               | [4]         |
| Ni <sub>0.8</sub> Fe <sub>0.2</sub> -MOF-B                              | 301                                               | 62                                           | GC               | [5]         |
| ZIF-62-(Co)-Fe-CC                                                       | 335                                               | 44.3                                         | CC               | [6]         |
| [Co <sub>7</sub> (t-ca) <sub>14</sub> (H <sub>2</sub> O) <sub>2</sub> ] | 361                                               | 53                                           | GC               | [7]         |
| Co-BTC-IMI                                                              | 360                                               | 88                                           | RDE              | [8]         |
| CTGU-10c2                                                               | 240                                               | 58                                           | GC               | [9]         |
| CoFe-PYZ                                                                | 300                                               | 44                                           | GC               | [7]         |
| 2D CoZIF-9(III) sheets                                                  | 380                                               | 55                                           | GC               | [8]         |
| 2D-Co-NS                                                                | 310                                               | 81                                           | GC               | [9]         |
| CoFe-MOF                                                                | 355                                               | 49.05                                        | GC               | [10]        |
| Fe <sub>3</sub> -Co <sub>2</sub>                                        | 283                                               | 43                                           | GC               | [11]        |
| Co:Fe <sub>3</sub>                                                      | 453                                               | 63                                           | GC               | [12]        |
| Fe <sub>3</sub> -Fe                                                     | 460@1mA cm <sup>-2</sup>                          | 137                                          | GC               | [13]        |
| Fe <sub>3</sub>                                                         | 482@1mA cm <sup>-2</sup>                          | 112                                          | GC               | [14]        |
| FeCo-MNS                                                                | 298                                               | 21.6                                         | GC               | [15]        |
| CoBDC                                                                   | 490                                               | 48.8                                         | GC               | [16]        |
| MOF-H <sub>2</sub>                                                      | 337( $\eta_j=15$ )                                | N/A                                          | GC               | [17]        |
| MAF-X27-OH                                                              | 461                                               | 66                                           | GC               | [18]        |
| Co-WOC-1                                                                | 390@1mA cm <sup>-2</sup>                          | 128                                          | GC               | [19]        |
| W-625 <sup>a</sup>                                                      | 327±7                                             | -                                            | -                | [20]        |
| W-718 <sup>a</sup>                                                      | 320±10                                            | -                                            | -                | [20]        |

|                                                              |            |              |                              |                         |
|--------------------------------------------------------------|------------|--------------|------------------------------|-------------------------|
| W-825 <sup>a</sup>                                           | 322±3      | -            | -                            | [20]                    |
| W-286 <sup>a</sup>                                           | 339±4      | -            | -                            | [20]                    |
| W-316L <sup>a</sup>                                          | 340±20     | -            | -                            | [20]                    |
| IrO <sub>2</sub> , 20 μg cm <sup>-2</sup>                    | 400±10     | -            | GC                           | [20]                    |
| IrO <sub>2</sub> , 100 μg cm <sup>-2</sup>                   | 354±3      | -            | GC                           | [20]                    |
| Fe-Ni LDH                                                    | 130        | -            | <i>e-Ni foil<sup>b</sup></i> | [21]                    |
| Electrodeposited Fe–Ni film<br>(Fe/Ni=0.67)                  | 280        | -            | -                            | [22]                    |
| Ni(OH) <sub>2</sub>                                          | 573        | -            | RDE                          | [23]                    |
| NiFe LDH                                                     | 348        | -            | RDE                          | [23]                    |
| AISI 304 activated steel<br>(Elox300)                        | 269        | 66           | -                            | [24]                    |
| Three-dimensional S235<br>steek (phosphorization)            | 326        | 68.7         | -                            | [25]                    |
| IrO <sub>2</sub> , 210 μg cm <sup>-2</sup>                   | 330        | -            | GC                           | [26]                    |
| <b>(Co<sub>1</sub>Ni<sub>1</sub>)<sub>2</sub>Fe(II)-MOF</b>  | <b>295</b> | <b>48.48</b> | <b>GC</b>                    | <b><i>This work</i></b> |
| <b>(Co<sub>1</sub>Ni<sub>1</sub>)<sub>2</sub>Fe(III)-MOF</b> | <b>309</b> | <b>97.04</b> | <b>GC</b>                    | <b><i>This work</i></b> |

## References

- [1] Li, F.-L.; Shao, Q.; Huang, X.-Q.; Lang, J.-P. *Angew. Chem. Int.* **2018**, *57*, 1888-1892.
- [2] C. McCrory, S. Jung, I. M. Ferrer, S. M. Chatman, J. C. Peters, T. F. Jaramillo, *J. Am. Chem. Soc.* **2015**, *137*, 4347-4357.
- [3] Chen, R.; Wang, H.-Y.; Miao, J.; Yang, H.; Liu, B.; *Nano Energy.* **2015**, *11*, 333-340.
- [4] Wu, J.-Q.; Zhao, Z.-H.; Hua, Y.-W.; Wu, Y.-L.; Ye, S.-Y.; Qian, J.-T.; Li, M.-L.; Zhu, L.-W.; Yan, Z.; Cao, X. *Inorg. Chem.* **2023**, *62*, 15641–15650.
- [5] Zhang, H.-D.; Wu, Y.-L.; Ye, S.-Y.; Hua, Y.-W.; You, X.-X.; Yan, Z.; Li, M.-L.; Liu, D.; Meng, Y.; Cao, X. *ChemElectroChem* **2022**, *9*, e202200246.
- [6] Lin, R.; Li, X.; Krajnc, A.; Li, Z.; Li, M.; Wang, W.; Zhuang, L.; Smart, S.; Zhu, Z.; Appadoo, D.; Harmer, JR.; Wang, Z.; Buzanich, AG.; Beyer, S.; Wang, L.; Mali, G.; Bennett, TD.; Chen, V.; Hou, J. *Angew. Chem., Int. Ed.* **2022**, *61*, e202112880.
- [7] Kang, J.; Lee, M. J.; Oh, N. G.; Shin, J.; Kwon, S. J.; Chun, H.; Kim, S. J.; Yun, H.; Jo, H.; Ok, K. M.; Do, J. *Chem. Mater.* **2021**, *33*, 2804–2813.
- [8] Wang, H.; Zhang, X.; Yin, F.; Chu, W.; Chen, B. *J Mater. Chem. A*, **2020**, *8*, 22111–22123
- [9] Zhou, W.; Huang, D.; Wu, Y.; Zhao, J.; Wu, T.; Zhang, J.; Li, D.; Sun, C.; Feng, P.; Bu, X. *Angew. Chem., Int. Ed.* **2019**, *58*, 4227-4231.
- [10] Gao, J.; Cong, J.; Wu, Y.; Sun, L.; Yao, J.; Chen, B. *ACS Appl. Energy Mater.* **2018**, *1*, 5140-5144.
- [11] Jayaramulu, K.; Masa, J.; Morales, D. M.; Tomanec, O.; Ranc, V.; Petr, M.; Wilde, P.; Chen, Y.-T.; Zboril, R.; Schuhmann, W.; Fischer, R. A. *Adv. Sci.* **2018**, *5*, 1801029.
- [12] Huang, J.; Li, Y.; Huang, R.-K.; He, C.-T.; Gong, L.; Hu, Q.; Wang, L.; Xu, Y.-T.; Tian, X.-Y.; Liu, S.-Y.; Ye, Z.-M.; Wang, F.; Zhou, D.-D.; Zhang, W.-X.; Zhang, J.-P. *Angew. Chem., Int. Ed.* **2018**, *57*, 4632-4636.
- [13] Yang, C.; Cai, W.-J.; Yu, B.-B.; Qiu, H.; Li, M.-L.; Zhu, L.-W.; Yan, Z.; Hou, L.; Wang, Y.-Y. *Catal. Sci. Technol.* **2020**, *10*, 3897-3903.
- [14] Shen, J.-Q.; Liao, P.-Q.; Zhou, D.-D.; He, C.-T.; Wu, J.-X.; Zhang, W.-X.; Zhang, J.-P.; Chen, X.-M. *J. Am. Chem. Soc.* **2017**, *139*, 1778-1781.
- [15] Zhan, G.; Fan, L.; Zhao, F.; Huang, Z.; Chen, B.; Yang, X.; Zhou, S.-f. *Adv. Funct. Mater.* **2019**, *29*, 1806720.

- [16] Zhao, L.; Dong, B.; Li, S.; Zhou, L.; Lai, L.; Wang, Z.; Zhao, S.; Han, M.; Gao, K.; Lu, M.; Xie, X.; Chen, B.; Liu, Z.; Wang, X.; Zhang, H.; Li, H.; Liu, J.; Zhang, H.; Huang, X.; Huang, W. *ACS Nano* **2017**, *11*, 5800-5807.
- [17] Jiang, Z.; Ge, L.; Zhuang, L.; Li, M.; Wang, Z.; Zhu, Z. *ACS Appl. Mater. Interfaces* **2019**, *11*, 44300-44307.
- [18] Lu, X.-F.; Liao, P.-Q.; Wang, J.-W.; Wu, J.-X.; Chen, X.-W.; He, C.-T.; Zhang, J.-P.; Li G.-R.; Chen, X.-M. *J. Am. Chem. Soc.* **2016**, *138*, 8336–8339.
- [19] Manna, P.; Debgupta, J.; Bose, S.; Das, S. K. *Angew. Chem., Int. Ed.* **2016**, *55*, 2425-2430.
- [20] Magnier, L.; Cossard, G.; Martin, V.; Pascal, C.; Roche, V.; Sibert, E.; Shchedrina, I.; Bousquet, R.; Parry, V.; Chatenet, M. *Nat. Mater.* **2024**, *23*, 252-261.
- [21] Xiang, Q.; Li, F.; Chen, W.-L.; Ma, Y.-L.; Wu, Y.; Gu, X.; Qin, Y.; Tao, P.; Song, C.-Y.; Shang, W.; Zhu, H.; Deng, T.; Wu, J.-B. *ACS Energy Lett.* **2018**, *3*, 10, 2357-2365.
- [22] Louie, M. W.; Bell, A. T. *J. Am. Chem. Soc.* **2013**, *135*, 12329-12337.
- [23] Dionigi, F.; Zeng, Z.; Sinev, I.; Merzdort, T.; Deshpande, S.; Lopez, M. B.; Kunze, S.; Zegkinoglou, I.; Sarodnik, H.; Fan, D.-X.; Bergmann, A.; Drnec, J.; Araujo, J. F.; Gliech, M.; Teschner, D.; Zhu, J.; Li, W.-X.; Greeley, J.; Cuenya, B. R.; Strasser, P. *Nat Commun.* **2020**, *11*, 2522.
- [24] Schäfer, H.; Sadaf, S.; Walder, L.; Kuepper, K.; Dingklage, S.; Wollschläger, J.; Schneider, L.; Steinhart, M.; Hardege, J.; Daum, D. *Energy Environ. Sci.* **2015**, *8*, 2685-2697.
- [25] Han, W.-J.; Kuepper, K.; Hou, P.-L.; Akram, W.; Eickmeier, H.; Hardege, J.; Steinhart, M.; Schäfer, H. *Chem. Sus. Chem.* **2018**, *11*, 3661-3671.
- [26] Liu, L.-X.; Liu, W.; Ko, M.; Park, M.; Kilm, M. G.; Oh, P.; Chase, S.; Park, S.; Casimir, A.; Wu, G.; Cho, J. *Adv. Funct. Mater.* **2015**, *25*, 5799-5808.
